# Supplementary material
Source: PubMed Central journal article supplement (PMC3251084)
Supplement: 1113956108_pnas.1113956108_SI.pdf [file 1113956108_pnas.1113956108_SI.pdf]

# Supporting Information

Shoemaker and Green 10.1073/pnas.1113956108

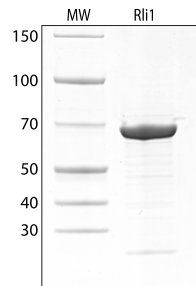

**Fig. S1.** Coomassie-stained SDS-PAGE of purified recombinant Rli1-His<sub>6</sub> from yeast. The expected molecular weight of Rli1 is 68 kDa. MW, molecular weight markers.

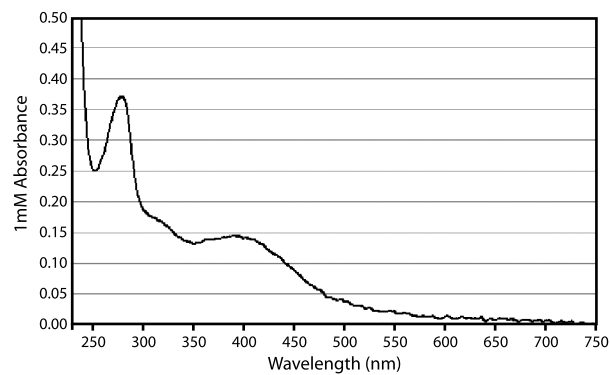

**Fig. S2.** UV-visible absorbance spectra of purified recombinant Rli1. Characteristic absorbance of 2[4Fe-4S] clusters is seen at A<sub>390</sub>.

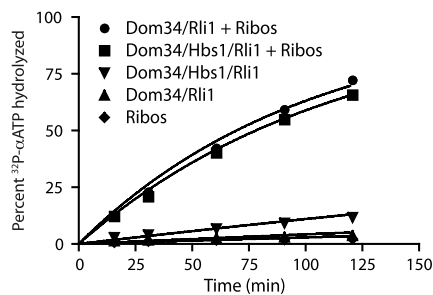

**Fig. S3.** ATP hydrolysis control reactions. Hydrolysis of <sup>32</sup>P-ATP to <sup>32</sup>P-ADP was measured by thin-layer chromatography at various time points in the presence of the factors indicated. Ribos, ribosomes.

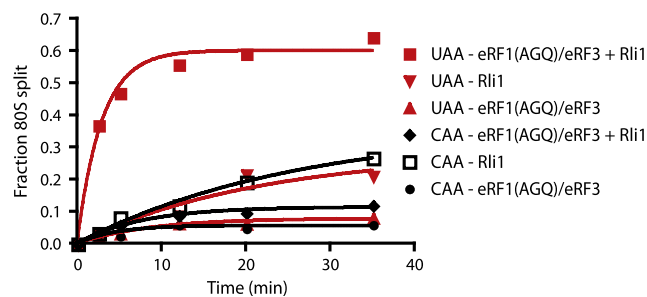

**Fig. 54.** Factor dependence of eRF1(AGQ)-mediated subunit dissociation on dipeptidyl-tRNA ribosome complexes containing an A-site stop codon (UAA) or nonstop codon (CAA). Subunit dissociation was measured by monitoring peptidyl-tRNA drop-off in a native gel system.

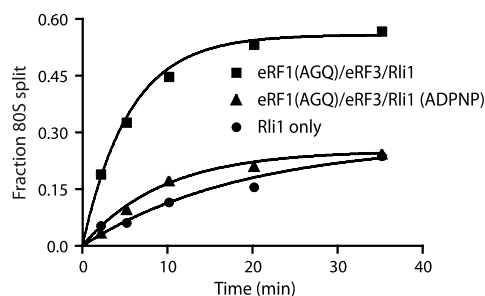

**Fig. 55.** ATP dependence of Rli1-mediated recycling in the presence of eRF1(AGQ):eRF3. Subunit dissociation was monitored as peptidyl-tRNA drop-off in a native gel system. Coordination between Rli1 and termination factors requires ATP hydrolysis.

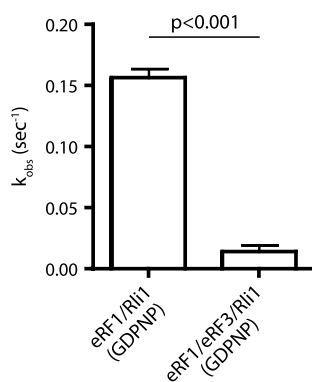

**Fig. 56.** Effect of GDPNP on eRF1:Rli1-mediated release in the presence and absence of eRF3 ( $n \geq 3$ ,  $\pm$ SEM). Reported rate constants were extrapolated by monitoring subunit dissociation via native gel electrophoresis. Statistics were determined using a Student's *t* test.

**Table S1. DNA oligonucleotides used for cloning**

| Oligo  | Sequence                                       | Designation   |
|--------|------------------------------------------------|---------------|
| oCS438 | GAGCTCAAAAATGAGTGATAAAAACAGTCG                 | Rli1 F pYES   |
| oCS439 | GCATGCTTAGTGATGGTGATGGTGATGAATACCGGTGTTATCCA   | Rli1 R pYES   |
| oCS501 | CCTCACTAAGTTTTGTTGTTCTGGCCATGGTGATGCGGGAAAATC  | Hbs1 5'V176G  |
| oCS502 | GATTTTCCGCATCACCATGGCCAAGAACAACAAAACCTAAGTGAGG | Hbs1 3'V176G  |
| oCS517 | ATATTGGATGCTCCTGGTGAGAAAATGTACGTTTCCGAG        | eRF3 5' H348E |
| oCS518 | CTCGAAACGTACATTTTCTACCAGGAGCATCCAATAT          | eRF3 3' H348E |
| oCS545 | CATATGAAGGTTATTAGTCTGAAAAAGG                   | Dom34 NdeI 5' |
| oCS546 | CCCGGGCTCCTACCATCGTCTT                         | Dom34 SmaI 3' |
